# Supplementary material for: Reevaluation of the impact of methicillin-resistance on outcomes in patients with Staphylococcus aureus bacteremia and endocarditis
Source: PubMed Central journal article supplement — Korean J Intern Med. 2018 Jan 20;34(6):1347–62. doi: 10.3904/kjim.2017.098 (PMC6823568; doi:10.3904/kjim.2017.098), 2018-01-20
Supplement: kjim-2017-098-suppl1.pdf [file kjim-2017-098-suppl1.pdf]

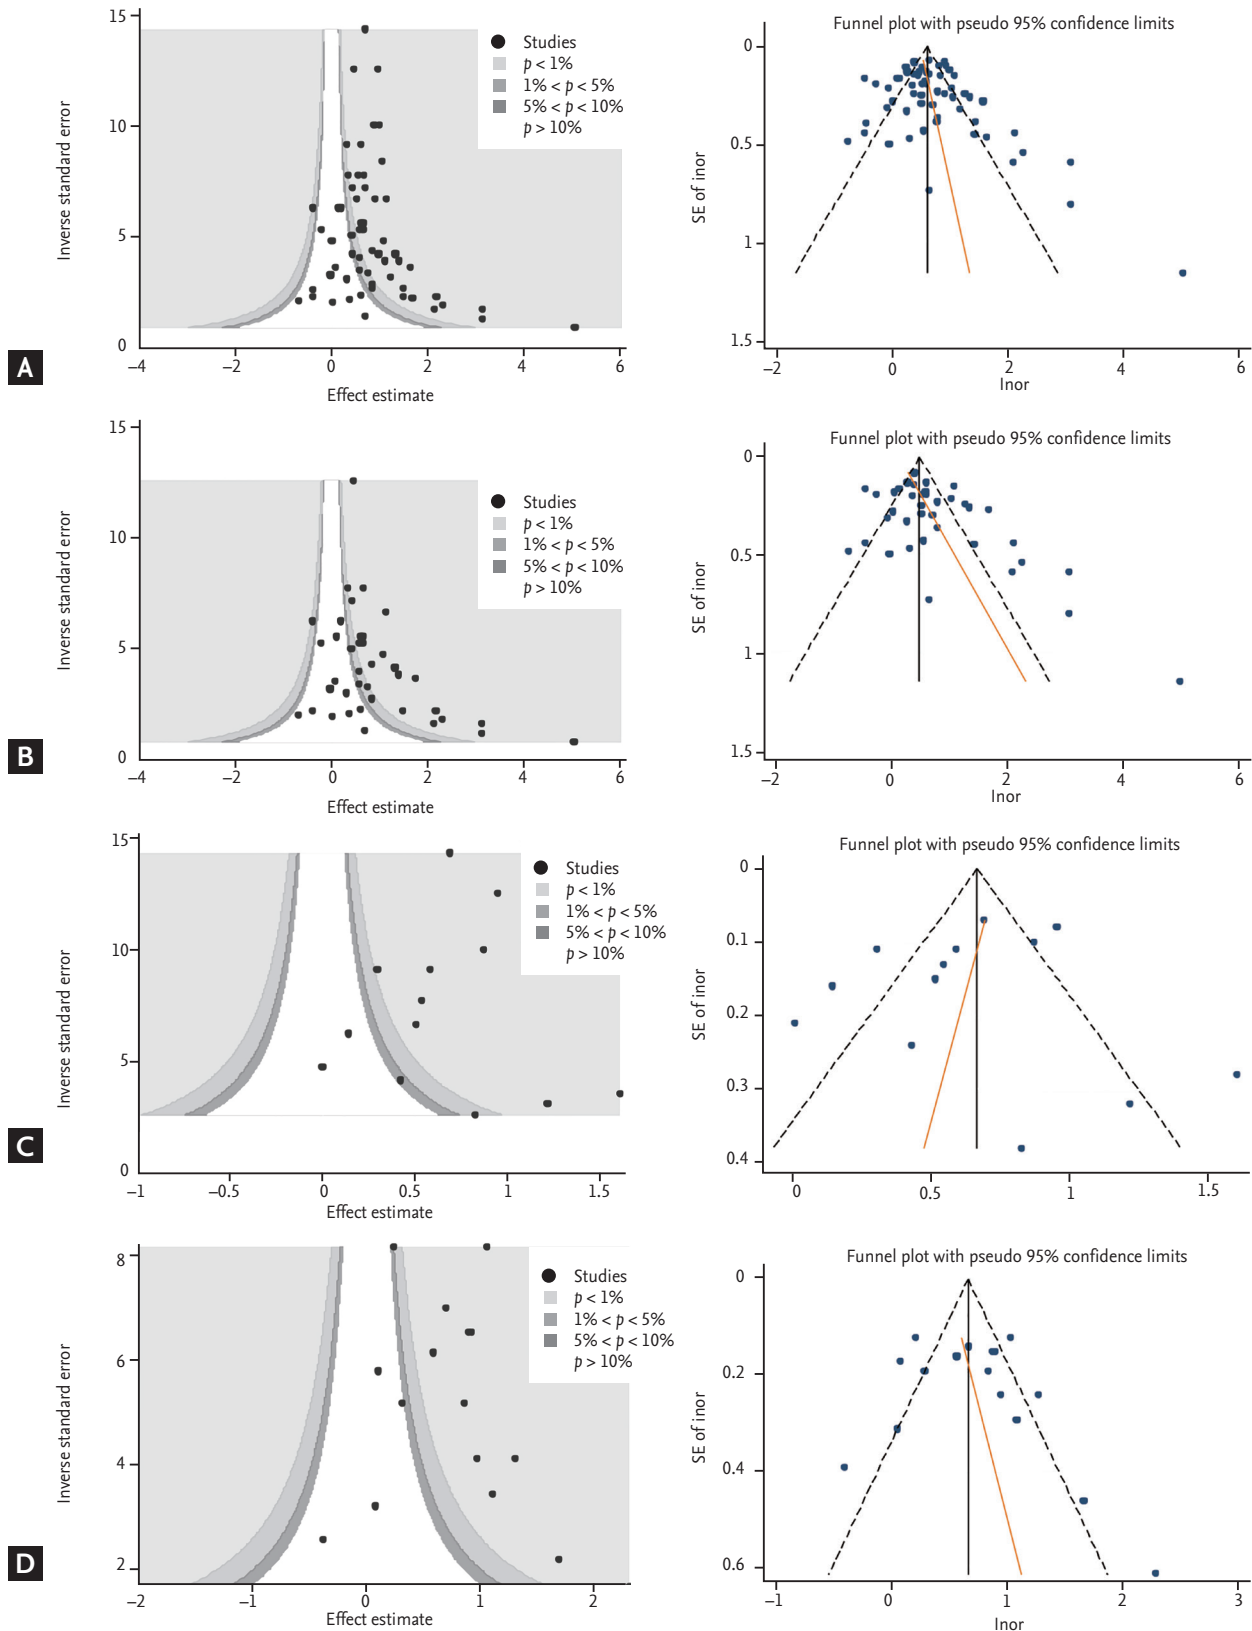

**Supplementary Figure 1.** Contour-enhanced funnel plot and Begg & Mazumdar's rank correlation test for exploring publication bias for all-cause mortality (A), in-hospital mortality (B), 30-day mortality (C), and *Staphylococcus aureus* bacteremia-related mortality (D).
